# Supplementary material
Source: Royal Society of Chemistry journal article supplement (doi:10.1039/d6dt00496b)
Supplement: d6dt00496b1.pdf [file d6dt00496b1.pdf]

# Electronic Supplementary Information (ESI) for: High performing $Y_3H_5P_6O_{22}$ and $Er_3H_5P_6O_{22}$ proton conductors: Preparation and Conductivity Study

Carlos M. R. Almeida<sup>a,b</sup>, Anatoly F. Selevich<sup>c,\*</sup>, Laura I. V. Holza<sup>a,b</sup>, Francisco J. A.  
Loureiro<sup>a,b,\*\*</sup>, Duncan P. Fagg<sup>a,b,\*\*\*</sup>

<sup>a</sup> TEMA – Centre for Mechanical Technology and Automation, Department of Mechanical Engineering,  
University of Aveiro, 3810-193 Aveiro, Portugal.

<sup>b</sup> LASI – Intelligent Systems Associate Laboratory, 4800-058 Guimarães, Portugal.

<sup>c</sup> Research Institute for Physical Chemical Problems of the Belarusian State University, 220006, Minsk,  
Belarus.

**Keywords:** Trivalent Metal phosphate, protonic conductivity, cold sintering.

**Corresponding authors:** \* [selevich@bsu.by](mailto:selevich@bsu.by) (Anatoly F. Selevich), \*\*  
[francisco.loureiro@ua.pt](mailto:francisco.loureiro@ua.pt) (Francisco J. A. Loureiro), and \*\*\* [duncan@ua.pt](mailto:duncan@ua.pt) (Duncan P. Fagg).

Table S1 – Indexing powder X-ray diffraction (PXRD) data of the EHPO compound.

| <i>h</i> | <i>k</i> | <i>l</i> | $2\theta_{\text{obs}}$ | $2\theta_{\text{calc}}$ | $d_{\text{calc}}, \text{\AA}$ | <i>I</i> , % |
|----------|----------|----------|------------------------|-------------------------|-------------------------------|--------------|
| 0        | 0        | 2        | 10.022                 | 10.023                  | 8.8181                        | 4            |
| 1        | 0        | 1        | 13.705                 | 13.711                  | 6.4535                        | 30           |
| 1        | 0        | 3        | 19.789                 | 19.786                  | 4.4836                        | 25           |
| 0        | 0        | 4        | 20.134                 | 20.127                  | 4.4082                        | 25           |
| 1        | 1        | 2        | 20.712                 | 20.713                  | 4.2850                        | 20           |
| 2        | 0        | 0        | 25.678                 | 25.676                  | 3.4668                        | 100          |
| 1        | 1        | 4        | 27.163                 | 27.183                  | 3.2779                        | 4            |
| 1        | 0        | 5        | 28.379                 | 28.372                  | 3.1432                        | 80           |
| 2        | 1        | 1        | 29.222                 | 29.220                  | 3.0539                        | 10           |
| 2        | 1        | 3        | 32.628                 | 32.626                  | 2.7425                        | 6            |
| 2        | 0        | 4        | 32.841                 | 32.841                  | 2.7249                        | 9            |
| 1        | 1        | 6        | 35.597                 | 35.590                  | 2.5205                        | 35           |
| 2        | 2        | 0        | 36.628                 | 36.630                  | 2.4513                        | 20           |
| 1        | 0        | 7        | 37.983                 | 37.977                  | 2.3674                        | 4            |
| 2        | 1        | 5        | 38.636                 | 38.636                  | 2.3285                        | 13           |
| 3        | 0        | 1        | 39.292                 | 39.286                  | 2.2915                        | 6            |
| 1        | 1        | 7        | 40.201                 | 40.220                  | 2.2404                        | 4            |
| 0        | 0        | 8        | 40.915                 | 40.915                  | 2.2039                        | 10           |
| 3        | 0        | 3        | 41.972                 | 41.974                  | 2.1508                        | 15           |
| 3        | 1        | 2        | 42.451                 | 42.451                  | 2.1277                        | 18           |
| 2        | 1        | 7        | 46.412                 | 46.410                  | 1.9550                        | 4            |
| 3        | 0        | 5        | 46.972                 | 46.971                  | 1.9329                        | 20           |
| 3        | 2        | 1        | 47.526                 | 47.527                  | 1.9117                        | 5            |
| 1        | 0        | 9        | 48.236                 | 48.235                  | 1.8852                        | 15           |
| 2        | 0        | 8        | 48.934                 | 48.935                  | 1.8598                        | 8            |
| 3        | 2        | 3        | 49.858                 | 49.857                  | 1.8276                        | 10           |
| 3        | 1        | 6        | 52.002                 | 51.999                  | 1.7572                        | 35           |
| 4        | 0        | 0        | 52.766                 | 52.772                  | 1.7333                        | 15           |
| 3        | 2        | 5        | 54.295                 | 54.296                  | 1.6882                        | 10           |
| 2        | 1        | 9        | 55.438                 | 55.437                  | 1.6561                        | 10           |
| 2        | 2        | 8        | 56.062                 | 56.072                  | 1.6389                        | 3            |
| 4        | 1        | 3        | 56.914                 | 56.912                  | 1.6166                        | 4            |
| 4        | 0        | 4        | 57.052                 | 57.051                  | 1.6130                        | 4            |
| 3        | 3        | 2        | 57.293                 | 57.294                  | 1.6068                        | 6            |
| 1        | 0        | 11       | 59.111                 | 59.112                  | 1.5616                        | 6            |
| 4        | 2        | 0        | 59.585                 | 59.588                  | 1.5503                        | 8            |
| 4        | 1        | 5        | 60.999                 | 60.998                  | 1.5178                        | 6            |
| 3        | 0        | 9        | 62.064                 | 62.059                  | 1.4943                        | 5            |
| 0        | 0        | 12       | 63.240                 | 63.241                  | 1.4692                        | 2            |
| 4        | 2        | 4        | 63.576                 | 63.568                  | 1.4625                        | 3            |
| 3        | 3        | 6        | 65.281                 | 65.282                  | 1.4281                        | 9            |
| 2        | 1        | 11       | 65.499                 | 65.506                  | 1.4238                        | 10           |
| 5        | 0        | 1        | 67.740                 | 67.731                  | 1.3823                        | 3            |
| 3        | 2        | 9        | 68.297                 | 68.297                  | 1.3723                        | 5            |
| 4        | 0        | 8        | 68.859                 | 68.861                  | 1.3624                        | 3            |

|   |   |    |        |        |        |   |
|---|---|----|--------|--------|--------|---|
| 2 | 0 | 12 | 69.427 | 69.423 | 1.3527 | 4 |
| 5 | 0 | 3  | 69.613 | 69.610 | 1.3495 | 5 |

Table S2 – Indexing the powder X-ray diffraction (PXRD) data of the YHPO compound.

| <i>h</i> | <i>k</i> | <i>l</i> | $2\theta_{\text{obs}}$ | $2\theta_{\text{calc}}$ | $d_{\text{calc}}, \text{\AA}$ | <i>I</i> , % |
|----------|----------|----------|------------------------|-------------------------|-------------------------------|--------------|
| 0        | 0        | 2        | 10.026                 | 10.023                  | 8.8180                        | 3            |
| 1        | 0        | 1        | 13.701                 | 13.698                  | 6.4593                        | 15           |
| 1        | 0        | 3        | 19.774                 | 19.763                  | 4.4887                        | 3            |
| 0        | 0        | 4        | 20.111                 | 20.108                  | 4.4125                        | 45           |
| 1        | 1        | 2        | 20.683                 | 20.685                  | 4.2907                        | 4            |
| 2        | 0        | 0        | 25.635                 | 25.633                  | 3.4724                        | 100          |
| 1        | 1        | 4        | 27.128                 | 27.144                  | 3.2826                        | 3            |
| 1        | 0        | 5        | 28.335                 | 28.333                  | 3.1474                        | 90           |
| 2        | 1        | 1        | 29.164                 | 29.169                  | 3.0591                        | 3            |
| 2        | 0        | 4        | 32.788                 | 32.787                  | 2.7293                        | 6            |
| 1        | 1        | 6        | 35.532                 | 35.535                  | 2.5243                        | 2            |
| 2        | 2        | 0        | 36.557                 | 36.560                  | 2.4558                        | 10           |
| 1        | 0        | 7        | 37.923                 | 37.919                  | 2.3709                        | 2            |
| 2        | 1        | 5        | 38.568                 | 38.569                  | 2.3324                        | 7            |
| 3        | 0        | 1        | 39.210                 | 39.209                  | 2.2958                        | 4            |
| 2        | 0        | 6        | 40.129                 | 40.129                  | 2.2452                        | 3            |
| 0        | 0        | 8        | 40.851                 | 40.853                  | 2.2071                        | 15           |
| 3        | 0        | 3        | 41.897                 | 41.892                  | 2.1548                        | 10           |
| 3        | 1        | 2        | 42.366                 | 42.367                  | 2.1317                        | 7            |
| 2        | 1        | 7        | 46.322                 | 46.327                  | 1.9583                        | 2            |
| 3        | 0        | 5        | 46.875                 | 46.880                  | 1.9365                        | 10           |
| 1        | 0        | 9        | 48.152                 | 48.154                  | 1.8881                        | 25           |
| 2        | 0        | 8        | 48.847                 | 48.848                  | 1.8629                        | 3            |
| 3        | 2        | 3        | 49.752                 | 49.753                  | 1.8311                        | 4            |
| 3        | 1        | 6        | 51.893                 | 51.895                  | 1.7605                        | 20           |
| 4        | 0        | 0        | 52.663                 | 52.658                  | 1.7368                        | 10           |
| 3        | 2        | 5        | 54.181                 | 54.182                  | 1.6915                        | 6            |
| 2        | 1        | 9        | 55.337                 | 55.333                  | 1.6590                        | 6            |
| 3        | 3        | 2        | 57.165                 | 57.167                  | 1.6100                        | 3            |
| 1        | 0        | 11       | 59.011                 | 59.006                  | 1.5642                        | 6            |
| 4        | 2        | 0        | 59.451                 | 59.452                  | 1.5535                        | 4            |
| 4        | 1        | 5        | 60.862                 | 60.864                  | 1.5208                        | 3            |
| 3        | 0        | 9        | 61.937                 | 61.934                  | 1.4971                        | 4            |
| 3        | 3        | 6        | 65.134                 | 65.136                  | 1.4310                        | 5            |
| 2        | 1        | 11       | 65.362                 | 65.378                  | 1.4263                        | 6            |
| 2        | 0        | 12       | 69.293                 | 69.285                  | 1.3551                        | 2            |
| 5        | 0        | 3        | 69.457                 | 69.444                  | 1.3524                        | 2            |

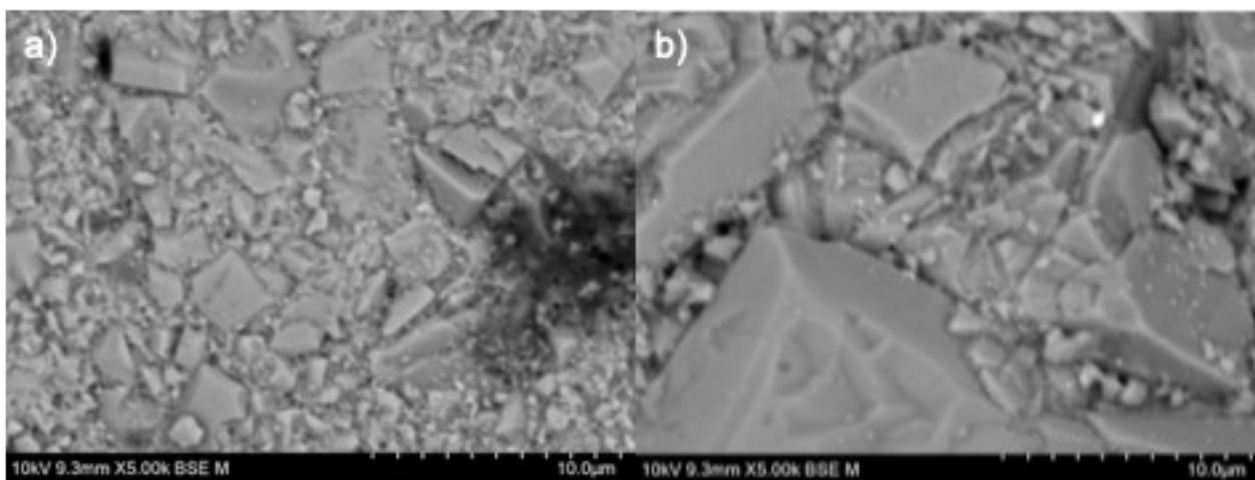

Figure S1 – Scanning electron microscopy (SEM) images obtained after cold sintering for a) EHPO and b) YHPO samples.

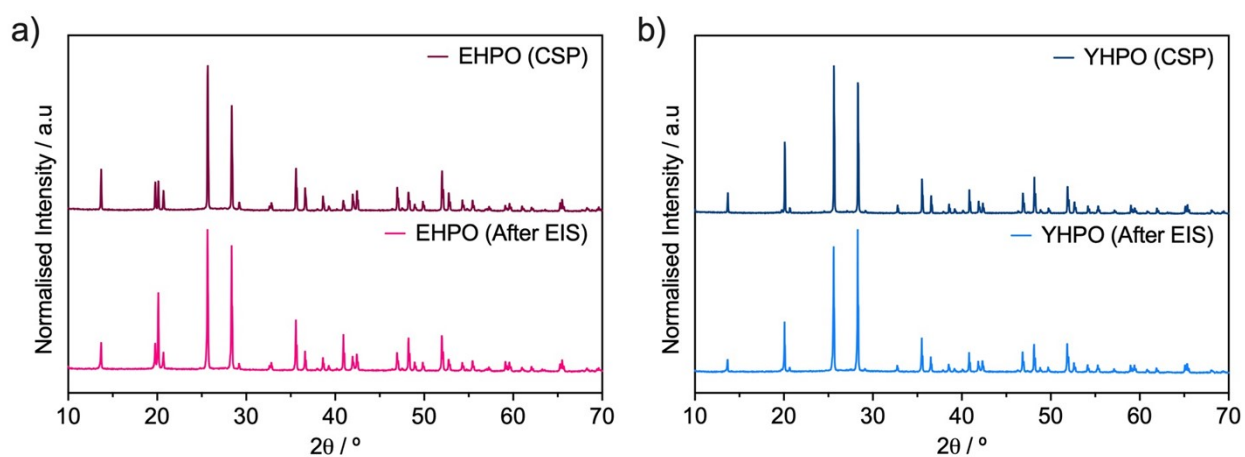

Figure S2 – Powder X-ray diffraction (PXRD) patterns obtained for the synthesised a) EHPO and b) YHPO compounds obtained after CSP, alongside with the patterns obtained for the samples after EIS measurements.
